# Supplementary material
Source: PubMed Central journal article supplement (PMC3236813)
Supplement: NIHMS318763-supplement-01.pdf [file NIHMS318763-supplement-01.pdf]

Chung *et al.* Stearoyl gemcitabine nanoparticles overcome resistance related to the over-expression of ribonucleotide reductase subunit M1

**Supplemental Figure S1.**

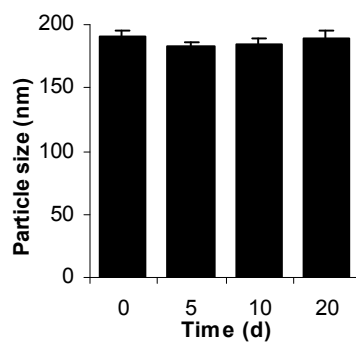

The stability of GemC18-NPs in aqueous suspension in ambient condition. Data shown are mean S.D. (n = 3).

### Supplemental Figure S2.

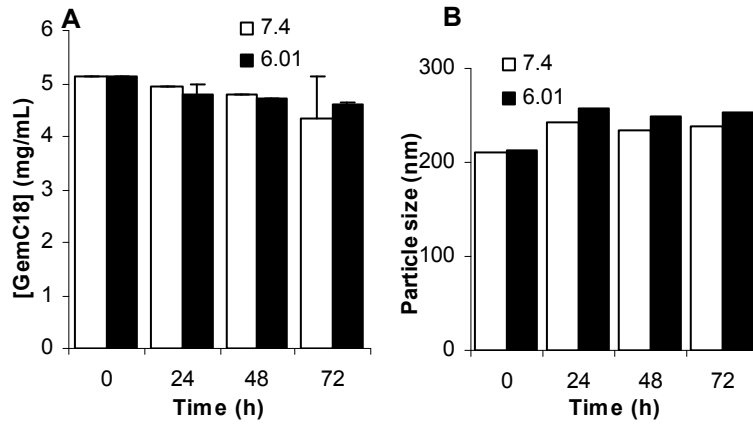

Chemical (A) and physical stability (B) of GemC18-NPs at 37 °C in PBS (pH 7.4 or pH 6.01).

**Supplemental Table S1.** The cytotoxicity of GemC18-NPs in cell culture media with or without penicillin and streptomycin (p/s). TC-1-GR cells (5,000/well) were incubated with GemC18-NPs for 48 h. Cell viability was determined using an MTT assay.

|                            | <b>% TC-1-GR cells alive (n = 6)</b> |
|----------------------------|--------------------------------------|
| <b>With p/s</b>            | 28.9 ± 20.6%                         |
| <b>Without p/s</b>         | 30.4 ± 17.5%                         |
| <b>p value from t-test</b> | 0.89                                 |

### Supplemental Figure S3.

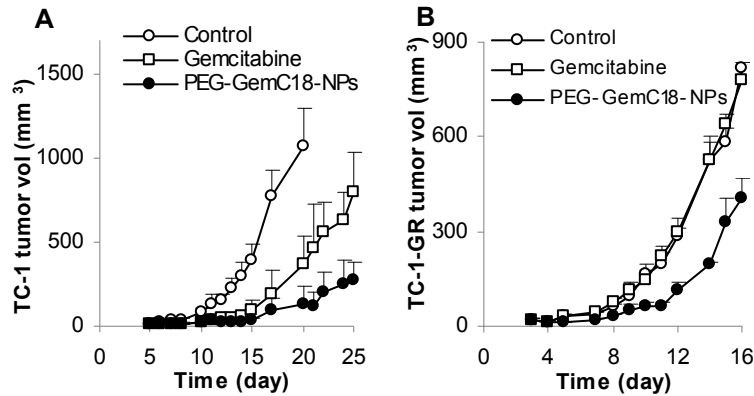

The anti-tumor activity of PEGylated GemC18-NPs in nude mice with pre-established TC-1 (**A**) or TC-1-GR (**B**) tumors. Tumor cells ( $5 \times 10^5$ /mouse) were subcutaneously implanted in mice on day 0. On days 5 and 11 for TC-1 cells, and days 3 and 9 for TC-1-GR cells, mice were injected via the tail vein with gemcitabine HCl (0.56 mg), the molar equivalent of GemC18 in PEG-GemC18-NPs (1 mg GemC18), or 200  $\mu$ L of sterile mannitol (5%, w/v) as a negative control. Data reported are mean  $\pm$  SD (n = 3-4).
